# Supplementary material for: Prediction of mono- and di-nucleotide-specific DNA-binding sites in proteins using neural networks
Source: PubMed Central journal article supplement (PMC2693520; doi:10.1186/1472-6807-9-30), 2009-05-13
Supplement: 1472-6807-9-30-S1.pdf [file 1472-6807-9-30-S1.pdf]

## Table of Contents

|                                                                                                                                                                        |    |
|------------------------------------------------------------------------------------------------------------------------------------------------------------------------|----|
| <b>Data set and contacting residue counts:</b> .....                                                                                                                   | 2  |
| TableS1: PDB codes of PDNA-159, a non-redundant data set of DNA-binding proteins.....                                                                                  | 2  |
| TableS2: Frequency distribution of mononucleotide specific contacts of residues in different secondary structures and states of solvent accessibility.....             | 3  |
| TableS3: Frequency distribution of major and minor groove contacts of mononucleotides. ....                                                                            | 3  |
| TableS4: Frequency distribution of different contact types of residues in different secondary structures and states of solvent accessibility. ....                     | 4  |
| TableS5: Frequency distribution of dinucleotide step-specific contacts of single residues for different secondary structures and states of solvent accessibility. .... | 5  |
| TableS6: Frequency distributions of major and minor groove contacts of dinucleotide steps. ....                                                                        | 6  |
| <b>Propensity scores:</b> .....                                                                                                                                        | 7  |
| TableS7: Propensity scores for different contact types of mononucleotides.....                                                                                         | 7  |
| TableS8: Propensity of amino acid residue for major and minor groove contacts with mononucleotides.....                                                                | 8  |
| <b>Prediction performance:</b> .....                                                                                                                                   | 9  |
| TableS9: Prediction performance of mononucleotide contacts.....                                                                                                        | 9  |
| TableS10: Prediction performance for major and minor groove contact of mononucleotides .....                                                                           | 10 |
| TableS11: Prediction performance for different contact types of mononucleotides. ....                                                                                  | 11 |
| TableS12: Prediction performance for dinucleotide step contacts. ....                                                                                                  | 12 |
| TableS13: Prediction performance for major and minor groove contacts of dinucleotide steps....                                                                         | 13 |

## Data set and contacting residue counts:

TableS1: PDB codes of PDNA-159, a non-redundant data set of DNA-binding proteins.

(Fifth letter is chain identifier).

| <b>Helix Turn Helix (Group I)</b>          |       |       |       |       |       |       |       |       |       |       |
|--------------------------------------------|-------|-------|-------|-------|-------|-------|-------|-------|-------|-------|
| 1k78I                                      | 1lliB | 1ignA | 2heoD | 1f4kB | 1tc3C | 1d3uB | 1l3lB | 1j59A | 1hcrA | 1k79D |
| 1mmnC                                      | 1b8iB | 1j1vA | 2irfJ | 1ig7A | 1pufB | 1bl0A | 1yrnA | 1au7B | 6paxA | 1akhB |
| 1k61B                                      | 1hlvA | 1pufA | 2o4aA | 1gxpB | 1trrG | 1sfuB | 1pueF | 1w0uA | 1qbjB |       |
| <b>Zinc Coordinating (Group II)</b>        |       |       |       |       |       |       |       |       |       |       |
| 1f2iG                                      | 2nllB | 1ubdC | 2a66A | 2i13B | 1hwtH | 1llmD | 1zmeD | 2ahiA | 1p47A | 1v15D |
| <b>Zipper type (Group III)</b>             |       |       |       |       |       |       |       |       |       |       |
| 1am9B                                      | 1h89C | 1h8aA | 1nlwD | 2h7hB | 1gd2G | 1nlwB |       |       |       |       |
| <b>Other alpha helical (Group IV)</b>      |       |       |       |       |       |       |       |       |       |       |
| 1crxB                                      | 1n6jB | 1zs4C | 1cktA | 1b3tA | 1mmB  | 1qrvA |       |       |       |       |
| <b>Beta-Sheet (Group V)</b>                |       |       |       |       |       |       |       |       |       |       |
| 1qn7B                                      | 1m1C  |       |       |       |       |       |       |       |       |       |
| <b>Beta-hairpin/ Ribbon (Group VI)</b>     |       |       |       |       |       |       |       |       |       |       |
| 1bdtC                                      | 1xbrB | 1mjgG | 2iieA | 1ihfA | 2i06A | 2bnwA | 2ntcB |       |       |       |
| <b>Enzymes (Group VII)</b>                 |       |       |       |       |       |       |       |       |       |       |
| 1a35A                                      | 1m5rB | 1eyuB | 1ku7A | 1tezB | 2dtuC | 1sa3B | 1r7mB | 1iawB | 1qssA | 2aq4A |
| 1ippA                                      | 1k82D | 1dizA | 4bdpA | 1skrA | 2ex5A | 1zetA | 1rh6B | 3bamA | 2p0jB | 2oaaA |
| 1stxA                                      | 1qumA | 1d02B | 1mowD | 1rrqA | 2ezvA | 2i3pB | 1rxwA | 1qaiB | 2aoqA | 1xhvB |
| 2pi4A                                      | 1rrjA | 1dfmB | 1murA | 1wbdA | 2fccB | 2ofiA | 2owoA | 1emjA | 2bcqA | 1t2tA |
| 1cw0A                                      | 1ewqA | 1f6oA | 1oe5A | 1wteA | 2fkcB | 2b9sB | 2h27D | 2ge5A | 1dnkA | 1n56B |
| 1dc1A                                      | 1fjxA | 1fiuD | 1orpA | 1ya6A | 1m5xB | 2dp6A | 2is6B | 2jg3D | 1oupA | 2g1pA |
| 1yqmA                                      | 2q10A |       |       |       |       |       |       |       |       |       |
| <b>Histones/ Histone-like (Group VIII)</b> |       |       |       |       |       |       |       |       |       |       |
| 1wd1A                                      | 1kx5E | 1eqzG | 1kx5C | 2cv5A | 1kx5F | 1kx5D | 2cv5C | 2cv5D |       |       |
| <b>Others/ Unknown (Group IX)</b>          |       |       |       |       |       |       |       |       |       |       |
| 1j3eA                                      | 1je8B | 1jeyA | 1jeyB | 1jj4A | 1lq1D | 1nfbB | 1ozjA | 2d5vB | 2eviA | 2iszB |
| 1u8bA                                      | 1uutB | 2a07J | 2c6yA |       |       |       |       |       |       |       |

TableS2: Frequency distribution of mononucleotide specific contacts of residues in different secondary structures and states of solvent accessibility. All percentages are calculated relative to the total number of residues in corresponding categories (column labels). For example, there are 3.15% residues in contact with Ade, whereas within helical residues this number is 2.27%.

|     | Percent contacts<br>(absolute<br>number) | Helix      | Strand     | Others     | Exposed    | Buried     |
|-----|------------------------------------------|------------|------------|------------|------------|------------|
| Ade | 3.15 (1018)                              | 2.27 (303) | 3.11 (156) | 4.00 (559) | 4.85 (785) | 1.44 (233) |
| Cyt | 3.06 (991)                               | 2.45 (327) | 2.47 (124) | 3.86 (540) | 4.61 (745) | 1.52 (246) |
| Gua | 3.66 (1185)                              | 2.92 (390) | 3.93 (197) | 4.28 (598) | 5.47 (885) | 1.85 (300) |
| Thy | 3.35 (1084)                              | 2.90 (388) | 2.87 (144) | 3.95 (552) | 5.24 (847) | 1.46 (237) |

TableS3: Frequency distribution of major and minor groove contacts of mononucleotides. All values are in % units and absolute numbers are in parenthesis.

| Groove and nucleotide |     | Overall    | Helix      | Strand    | Others     |
|-----------------------|-----|------------|------------|-----------|------------|
| Major                 | Ade | 0.52 (167) | 0.05 (70)  | 0.54 (27) | 0.50 (70)  |
|                       | Cyt | 0.62 (202) | 0.58 (78)  | 0.68 (34) | 0.64 (90)  |
|                       | Gua | 0.92 (297) | 0.88 (117) | 1.14 (57) | 0.88 (123) |
|                       | Thy | 0.64 (208) | 0.82 (110) | 0.56 (28) | 0.50 (70)  |
| Minor                 | Ade | 0.36 (118) | 0.12 (16)  | 0.28 (14) | 0.63 (88)  |
|                       | Cyt | 0.24 (78)  | 0.15 (20)  | 0.12 (6)  | 0.37 (52)  |
|                       | Gua | 0.37 (119) | 0.21 (28)  | 0.26 (13) | 0.56 (78)  |
|                       | Thy | 0.43 (140) | 0.20 (27)  | 0.44 (22) | 0.65 (91)  |

TableS4: Frequency distribution of different contact types of residues in different secondary structures and states of solvent accessibility. All values are in % units and absolute numbers are in parenthesis. Abbreviations: MC: Protein main chain, SC: Protein side chain, BB: DNA backbone, NB: Nucleotide base

| Contact type and nucleotide |     | Overall    | Helix      | Strand     | Others     | Exposed    | Buried     |
|-----------------------------|-----|------------|------------|------------|------------|------------|------------|
| MC-BB                       | Ade | 0.92 (297) | 0.35 (47)  | 0.88 (44)  | 1.47 (206) | 1.40 (226) | 0.44 (71)  |
|                             | Cyt | 0.98 (318) | 0.43 (58)  | 0.82 (41)  | 1.57 (219) | 1.42 (229) | 0.55 (89)  |
|                             | Gua | 0.99 (320) | 0.47 (63)  | 0.80 (40)  | 1.55 (217) | 1.39 (225) | 0.59 (95)  |
|                             | Thy | 0.99 (320) | 0.55 (73)  | 0.58 (29)  | 1.56 (218) | 1.49 (241) | 0.49 (79)  |
| SC-NB                       | Ade | 0.74 (241) | 0.58 (78)  | 0.72 (36)  | 0.91 (127) | 1.35 (218) | 0.14 (23)  |
|                             | Cyt | 0.70 (227) | 0.67 (90)  | 0.68 (34)  | 0.74 (103) | 1.21 (195) | 0.20 (32)  |
|                             | Gua | 1.07 (346) | 0.98 (131) | 1.30 (65)  | 1.07 (150) | 1.89 (305) | 0.25 (41)  |
|                             | Thy | 0.73 (235) | 0.59 (79)  | 0.72 (36)  | 0.86 (120) | 1.30 (211) | 0.15 (24)  |
| SC-BB                       | Ade | 1.96 (634) | 1.50 (201) | 2.05 (103) | 2.36 (330) | 2.99 (483) | 0.93 (151) |
|                             | Cyt | 1.79 (580) | 1.64 (219) | 1.36 (68)  | 2.10 (293) | 2.69 (435) | 0.90 (145) |
|                             | Gua | 2.06 (667) | 1.84 (246) | 2.13 (107) | 2.25 (314) | 2.95 (477) | 1.17 (190) |
|                             | Thy | 2.01 (650) | 2.01 (268) | 1.79 (90)  | 2.09 (292) | 2.98 (482) | 1.04 (168) |
| MC-NB                       | Ade | 0.11 (35)  | 0.04 (5)   | 0.10 (5)   | 0.18 (25)  | 0.19 (31)  | 0.02 (4)   |
|                             | Cyt | 0.19 (63)  | 0.04 (5)   | 0.16 (8)   | 0.36 (50)  | 0.33 (54)  | 0.06 (9)   |
|                             | Gua | 0.23 (73)  | 0.09 (12)  | 0.16 (8)   | 0.38 (53)  | 0.37 (60)  | 0.08 (13)  |
|                             | Thy | 0.13 (41)  | 0.06 (8)   | 0.10 (5)   | 0.20 (28)  | 0.24 (39)  | 0.01 (2)   |

TableS5: Frequency distribution of dinucleotide step-specific contacts of single residues for different secondary structures and states of solvent accessibility. All values are in % units and absolute numbers are in parenthesis.

| Step  | Overall    | Helix      | Strand     | Others     | Exposed    | Buried     |
|-------|------------|------------|------------|------------|------------|------------|
| AA/TT | 1.50 (485) | 1.14 (152) | 1.24 (62)  | 1.94 (271) | 2.36 (382) | 0.64 (103) |
| AC/GT | 2.22 (719) | 1.98 (264) | 1.93 (97)  | 2.56 (358) | 3.38 (546) | 1.07 (173) |
| AG/CT | 2.34 (758) | 1.60 (214) | 2.61 (131) | 2.96 (413) | 3.45 (558) | 1.24 (200) |
| AT/AT | 1.66 (538) | 1.29 (173) | 1.59 (80)  | 2.04 (285) | 2.60 (421) | 0.72 (117) |
| CA/TG | 0.78 (253) | 0.58 (78)  | 0.76 (38)  | 0.98 (137) | 1.28 (207) | 0.28 (46)  |
| CC/GG | 1.60 (517) | 1.44 (193) | 1.32 (66)  | 1.85 (258) | 2.45 (397) | 0.74 (120) |
| CG/CG | 1.22 (394) | 1.03 (138) | 1.24 (62)  | 1.39 (194) | 1.75 (283) | 0.69 (111) |
| GA/TC | 0.75 (244) | 0.58 (77)  | 0.68 (34)  | 0.95 (133) | 1.18 (191) | 0.33 (53)  |
| GC/GC | 0.56 (180) | 0.53 (71)  | 0.42 (21)  | 0.63 (88)  | 0.83 (134) | 0.28 (46)  |
| TA/TA | 0.30 (97)  | 0.22 (30)  | 0.12 (6)   | 0.44 (61)  | 0.51 (83)  | 0.09 (14)  |

TableS6: Frequency distributions of major and minor groove contacts of dinucleotide steps. All values are in % units and absolute numbers are in parenthesis.

| Groove | Step  | Overall    | Helix     | Strand    | Others    |
|--------|-------|------------|-----------|-----------|-----------|
| Major  | AA/TT | 0.20 (65)  | 0.26 (35) | 0.14 (7)  | 0.16 (23) |
|        | AC/GT | 0.46 (148) | 0.58 (77) | 0.60 (30) | 0.29 (41) |
|        | AG/CT | 0.42 (136) | 0.32 (43) | 0.58 (29) | 0.46 (64) |
|        | AT/AT | 0.25 (82)  | 0.30 (40) | 0.20 (10) | 0.23 (32) |
|        | CA/TG | 0.12 (38)  | 0.14 (19) | 0.04 (2)  | 0.12 (17) |
|        | CC/GG | 0.38 (123) | 0.39 (52) | 0.52 (26) | 0.32 (45) |
|        | CG/CG | 0.32 (105) | 0.23 (31) | 0.46 (23) | 0.36 (51) |
|        | GA/TC | 0.20 (65)  | 0.26 (35) | 0.22 (11) | 0.14 (19) |
|        | GC/GC | 0.11 (37)  | 0.13 (17) | 0.04 (2)  | 0.13 (18) |
|        | TA/TA | 0.05 (16)  | 0.09 (12) | 0.00 (0)  | 0.03 (4)  |
| Minor  | AA/TT | 0.15 (50)  | 0.04 (6)  | 0.04 (2)  | 0.30 (42) |
|        | AC/GT | 0.14 (45)  | 0.05 (7)  | 0.14 (7)  | 0.22 (31) |
|        | AG/CT | 0.21 (69)  | 0.11 (15) | 0.22 (11) | 0.31 (43) |
|        | AT/AT | 0.23 (74)  | 0.09 (12) | 0.24 (12) | 0.36 (50) |
|        | CA/TG | 0.11 (37)  | 0.05 (7)  | 0.14 (7)  | 0.16 (23) |
|        | CC/GG | 0.14 (44)  | 0.12 (16) | 0.06 (3)  | 0.18 (25) |
|        | CG/CG | 0.13 (41)  | 0.10 (13) | 0.02 (1)  | 0.16 (23) |
|        | GA/TC | 0.09 (29)  | 0.04 (5)  | 0.02 (1)  | 0.16 (23) |
|        | GC/GC | 0.06 (21)  | 0.05 (7)  | 0.06 (3)  | 0.08 (11) |
|        | TA/TA | 0.06 (21)  | 0.02 (3)  | 0.02 (1)  | 0.12 (17) |

## Propensity scores:

TableS7: Propensity scores for different contact types of mononucleotides.

| <b>(a) Propensity for any mononucleotide-atom to any residue-atom contact</b>            |      |      |      |      |      |      |      |      |      |      |      |      |      |      |      |      |      |      |      |      |
|------------------------------------------------------------------------------------------|------|------|------|------|------|------|------|------|------|------|------|------|------|------|------|------|------|------|------|------|
|                                                                                          | A    | C    | D    | E    | F    | G    | H    | I    | K    | L    | M    | N    | P    | Q    | R    | S    | T    | V    | W    | Y    |
| Ade                                                                                      | 0.4  | 0.57 | 0.42 | 0.21 | 0.58 | 0.92 | 1.51 | 0.4  | 2.22 | 0.17 | 0.48 | 2.34 | 0.53 | 1.49 | 2.85 | 1.28 | 1.16 | 0.25 | 0.95 | 1.68 |
| Cyt                                                                                      | 0.36 | 0.35 | 0.96 | 0.53 | 0.45 | 1.09 | 1.23 | 0.45 | 1.96 | 0.19 | 0.92 | 1.69 | 0.4  | 1.06 | 2.87 | 1.31 | 1.31 | 0.33 | 1.38 | 1.41 |
| Gua                                                                                      | 0.27 | 0.38 | 0.66 | 0.32 | 0.53 | 1.08 | 1.9  | 0.34 | 1.7  | 0.24 | 0.62 | 1.47 | 0.45 | 1.13 | 3.64 | 1.45 | 1.35 | 0.29 | 0.94 | 1.28 |
| Thy                                                                                      | 0.54 | 0.27 | 0.21 | 0.29 | 0.66 | 1.12 | 1.46 | 0.3  | 1.98 | 0.27 | 0.51 | 1.68 | 0.67 | 1.06 | 2.81 | 1.53 | 1.4  | 0.41 | 1.71 | 1.5  |
| <b>(b) Propensity for amino-acid backbone to nucleotide backbone contact (MC-BB)</b>     |      |      |      |      |      |      |      |      |      |      |      |      |      |      |      |      |      |      |      |      |
| Ade                                                                                      | 1.15 | 0.7  | 0.39 | 0.23 | 0.33 | 2.69 | 0.55 | 0.56 | 1.63 | 0.21 | 0.79 | 1.3  | 0.73 | 0.56 | 1.8  | 1.68 | 1.88 | 0.54 | 0.2  | 1.15 |
| Cyt                                                                                      | 0.8  | 0.24 | 0.85 | 0.23 | 0.47 | 2.74 | 0.75 | 0.79 | 1.43 | 0.23 | 0.87 | 1.39 | 0.52 | 0.96 | 1.44 | 2.04 | 1.48 | 0.55 | 1.27 | 0.89 |
| Gua                                                                                      | 0.65 | 0.49 | 1.13 | 0.34 | 0.75 | 2.93 | 1.14 | 0.57 | 1.00 | 0.66 | 0.17 | 1.17 | 0.35 | 0.99 | 1.24 | 2.00 | 1.53 | 0.76 | 0.99 | 0.55 |
| Thy                                                                                      | 1.45 | 0.22 | 0.23 | 0.28 | 0.48 | 3.16 | 1.15 | 0.47 | 1.29 | 0.49 | 0.57 | 0.84 | 0.92 | 0.92 | 1.19 | 2.1  | 1.39 | 0.53 | 0.4  | 0.6  |
| <b>(c) Propensity for amino-acid side chain to nucleotide backbone contact (SC-BB)</b>   |      |      |      |      |      |      |      |      |      |      |      |      |      |      |      |      |      |      |      |      |
| Ade                                                                                      | 0.24 | 0.37 | 0.38 | 0.15 | 0.69 | 0.00 | 1.84 | 0.46 | 2.75 | 0.11 | 0.41 | 2.09 | 0.44 | 1.19 | 3.27 | 1.49 | 1.21 | 0.18 | 1.33 | 1.89 |
| Cyt                                                                                      | 0.22 | 0.15 | 0.7  | 0.2  | 0.28 | 0.00 | 1.22 | 0.42 | 2.67 | 0.17 | 1.3  | 1.69 | 0.44 | 1.28 | 3.34 | 1.38 | 1.64 | 0.24 | 1.17 | 1.75 |
| Gua                                                                                      | 0.23 | 0.35 | 0.64 | 0.38 | 0.34 | 0.00 | 1.86 | 0.37 | 1.69 | 0.26 | 0.65 | 1.66 | 0.65 | 1.15 | 3.64 | 1.59 | 1.93 | 0.21 | 1.24 | 1.73 |
| Thy                                                                                      | 0.33 | 0.21 | 0.16 | 0.17 | 0.83 | 0.00 | 1.57 | 0.19 | 2.34 | 0.23 | 0.41 | 1.77 | 0.65 | 1.05 | 3.14 | 1.52 | 1.85 | 0.39 | 2.21 | 1.91 |
| <b>(d) Propensity for amino-acid backbone to nucleotide side chain contact (MC-NB)</b>   |      |      |      |      |      |      |      |      |      |      |      |      |      |      |      |      |      |      |      |      |
| Ade                                                                                      | 0.34 | 0.00 | 0.00 | 0.00 | 0.00 | 4.41 | 0.97 | 0.61 | 0.00 | 0.82 | 0.00 | 1.56 | 1.39 | 1.03 | 3.43 | 1.07 | 1.24 | 0.44 | 0.00 | 0.74 |
| Cyt                                                                                      | 0.63 | 0.00 | 1.11 | 0.2  | 1.42 | 4.5  | 1.91 | 0.00 | 1.09 | 0.19 | 0.00 | 2.4  | 0.41 | 0.67 | 1.14 | 1.45 | 0.71 | 0.24 | 1.04 | 1.28 |
| Gua                                                                                      | 0.16 | 0.00 | 0.83 | 0.17 | 1.36 | 5.57 | 0.00 | 0.43 | 0.93 | 0.26 | 1.97 | 1.58 | 0.32 | 0.9  | 0.81 | 1.75 | 0.64 | 0.5  | 1.33 | 1.4  |
| Thy                                                                                      | 0.63 | 0.00 | 0.8  | 0.00 | 0.00 | 6.85 | 0.00 | 0.39 | 1.66 | 0.24 | 2.24 | 1.09 | 0.63 | 0.00 | 1.1  | 0.43 | 0.53 | 0.99 | 1.17 | 0.75 |
| <b>(e) Propensity for amino-acid side chain to nucleotide side chain contact (SC-NB)</b> |      |      |      |      |      |      |      |      |      |      |      |      |      |      |      |      |      |      |      |      |
| Ade                                                                                      | 0.06 | 0.56 | 0.42 | 0.33 | 0.43 | 0.00 | 1.17 | 0.13 | 1.42 | 0.31 | 0.42 | 4.15 | 0.38 | 2.91 | 4.13 | 1.03 | 0.39 | 0.19 | 0.00 | 1.68 |
| Cyt                                                                                      | 0.06 | 0.81 | 1.68 | 1.59 | 0.41 | 0.00 | 1.9  | 0.33 | 0.83 | 0.00 | 0.67 | 2.32 | 0.21 | 1.21 | 4.06 | 0.82 | 0.8  | 0.29 | 1.81 | 1.58 |
| Gua                                                                                      | 0.03 | 0.35 | 0.41 | 0.17 | 0.42 | 0.00 | 2.62 | 0.19 | 2.16 | 0.05 | 0.58 | 1.82 | 0.16 | 1.46 | 5.77 | 1.22 | 0.61 | 0.11 | 0.41 | 0.94 |
| Thy                                                                                      | 0.17 | 0.33 | 0.00 | 0.42 | 0.97 | 0.00 | 1.03 | 0.23 | 1.66 | 0.12 | 0.94 | 2.38 | 0.84 | 1.14 | 4.81 | 0.91 | 0.73 | 0.28 | 1.63 | 2.17 |

TableS8: Propensity of amino acid residue for major and minor groove contacts with mononucleotides.

| Groove and nucleotide |     | Amino acid residue |      |      |      |      |      |      |      |      |      |      |      |      |      |      |
|-----------------------|-----|--------------------|------|------|------|------|------|------|------|------|------|------|------|------|------|------|
|                       |     | D                  | E    | F    | G    | H    | K    | M    | N    | P    | Q    | R    | S    | T    | W    | Y    |
| Major                 | Ade | 0.50               | 0.47 | 0.48 | 0.21 | 1.19 | 0.88 | 0.28 | 4.98 | 0.52 | 3.81 | 2.77 | 0.98 | 0.84 | 0.00 | 2.29 |
|                       | Cyt | 2.06               | 1.86 | 0.54 | 0.72 | 2.06 | 0.48 | 0.76 | 2.24 | 0.13 | 0.82 | 3.36 | 1.10 | 0.92 | 1.63 | 1.30 |
|                       | Gua | 0.14               | 0.19 | 0.33 | 0.68 | 2.95 | 2.23 | 0.68 | 1.23 | 0.00 | 1.43 | 6.09 | 1.26 | 0.50 | 0.44 | 0.56 |
|                       | Thy | 0.25               | 0.63 | 0.77 | 0.52 | 1.67 | 1.18 | 0.30 | 2.83 | 0.32 | 1.77 | 3.30 | 1.70 | 1.38 | 1.46 | 1.52 |
| Minor                 | Ade | 0.35               | 0.14 | 0.40 | 1.13 | 1.26 | 1.65 | 0.48 | 1.90 | 0.86 | 0.90 | 5.32 | 1.07 | 0.33 | 0.00 | 0.68 |
|                       | Cyt | 0.23               | 0.00 | 0.83 | 1.69 | 1.23 | 1.70 | 0.00 | 1.90 | 0.60 | 1.69 | 4.41 | 0.00 | 0.52 | 1.11 | 3.05 |
|                       | Gua | 1.35               | 0.15 | 1.38 | 1.63 | 0.30 | 1.20 | 1.27 | 2.35 | 0.83 | 1.84 | 2.41 | 0.88 | 0.91 | 1.92 | 2.18 |
|                       | Thy | 0.14               | 0.22 | 1.23 | 1.48 | 0.00 | 1.92 | 1.80 | 1.50 | 1.06 | 0.49 | 4.55 | 0.40 | 0.27 | 1.51 | 2.55 |



## Prediction performance:

TableS9: Prediction performance of mononucleotide contacts. All values are percentage area under the curve (AUC) of ROC curves.

Abbreviations: ASA: Accessible surface area, SS: Secondary structure, GAC: Global amino acid composition

| Nucleotide | Sequence | PSSM | Sequence +ASA+<br>SS+GAC | PSSM+ASA+<br>SS+GAC |
|------------|----------|------|--------------------------|---------------------|
| Ade        | 68.4     | 76.3 | 76.8                     | 81.0                |
| Cyt        | 68.3     | 73.1 | 73.4                     | 77.7                |
| Gua        | 68.8     | 75.8 | 76.5                     | 80.2                |
| Thy        | 66.2     | 75.9 | 75.9                     | 81.4                |

TableS10: Prediction performance for major and minor groove contact of mononucleotides. All values are percentage area under the curve (AUC) of ROC curves.

Abbreviations: ASA: Accessible surface area, SS: Secondary structure

| Groove | Nucleotide | Sequence | PSSM | Sequence+AS<br>A+SS | PSSM+ASA+<br>SS |
|--------|------------|----------|------|---------------------|-----------------|
| Major  | Ade        | 47.8     | 64.7 | 70.0                | 80.0            |
|        | Cyt        | 45.0     | 61.1 | 68.9                | 74.9            |
|        | Gua        | 48.6     | 78.6 | 76.7                | 85.5            |
|        | Thy        | 51.5     | 65.3 | 74.5                | 78.2            |
| Minor  | Ade        | 53.3     | 71.0 | 77.4                | 80.6            |
|        | Cyt        | 55.1     | 61.5 | 75.8                | 80.0            |
|        | Gua        | 49.4     | 53.8 | 74.7                | 78.7            |
|        | Thy        | 47.1     | 63.6 | 78.9                | 82.0            |

TableS11: Prediction performance for different contact types of mononucleotides. All values are percentage area under the curve (AUC) of ROC curves. Abbreviations: ASA: Accessible surface area, SS: Secondary structure, GAC: Global amino acid composition

| Contact types and nucleotide name | Sequence | PSSM | Sequence+ASA+SS+GAC | PSSM+ASA+SS+GAC |      |
|-----------------------------------|----------|------|---------------------|-----------------|------|
| MC-BB                             | Ade      | 58.1 | 69.7                | 71.5            | 74.9 |
|                                   | Cyt      | 55.4 | 66.3                | 70.1            | 73.3 |
|                                   | Gua      | 50.4 | 69.0                | 69.5            | 73.1 |
|                                   | Thy      | 55.5 | 69.0                | 68.7            | 74.2 |
| SC-NB                             | Ade      | 67.1 | 73.6                | 78.1            | 79.6 |
|                                   | Cyt      | 58.9 | 66.9                | 77.4            | 78.1 |
|                                   | Gua      | 65.6 | 83.0                | 85.3            | 85.5 |
|                                   | Thy      | 60.6 | 70.9                | 76.8            | 80.9 |
| SC-BB                             | Ade      | 66.0 | 78.7                | 79.5            | 82.7 |
|                                   | Cyt      | 61.3 | 78.3                | 75.6            | 80.9 |
|                                   | Gua      | 64.5 | 78.0                | 76.1            | 79.8 |
|                                   | Thy      | 65.1 | 79.3                | 77.3            | 82.2 |
| MC-NB                             | Ade      | 44.8 | 59.4                | 66.1            | 64.3 |
|                                   | Cyt      | 54.9 | 56.1                | 52.8            | 62.9 |
|                                   | Gua      | 55.7 | 52.3                | 56.8            | 40.0 |
|                                   | Thy      | 52.3 | 40.3                | 61.3            | 55.5 |
|                                   | any2any  | 68.2 | 78.3                | 77.0            | 82.4 |

TableS12: Prediction performance for dinucleotide step contacts. All values are percentage area under the curve (AUC) of ROC curves. Abbreviations: ASA: Accessible surface area, SS: Secondary structure, GAC: Global amino acid composition

| Step  | Sequence | PSSM | Seq+ASA+SS+<br>+GAC | PSSM+ASA+SS<br>+GAC |
|-------|----------|------|---------------------|---------------------|
| AA/TT | 62.3     | 77.4 | 77.5                | 80.4                |
| AC/GT | 62.1     | 77.6 | 75.6                | 80.4                |
| AG/CT | 60.0     | 77.5 | 72.5                | 77.6                |
| AT/AT | 61.9     | 77.3 | 78.1                | 81.6                |
| CA/TG | 57.3     | 69.5 | 72.6                | 74.6                |
| CC/GG | 55.1     | 75.4 | 70.0                | 75.5                |
| CG/CG | 56.6     | 73.2 | 69.5                | 73.7                |
| GA/TC | 63.9     | 77.4 | 76.8                | 79.1                |
| GC/GC | 62.0     | 71.4 | 70.6                | 73.4                |
| TA/TA | 55.9     | 67.0 | 68.5                | 75.6                |

TableS13: Prediction performance for major and minor groove contacts of dinucleotide steps. All values are percentage area under the curve (AUC) of ROC curves.

Abbreviations: ASA: Accessible surface area, SS: Secondary structure

| Groove | Step  | Sequence | PSSM | Seq+ASA+SS | PSSM+ASA+SS |
|--------|-------|----------|------|------------|-------------|
| Major  | AA/TT | 50.1     | 45.6 | 63.6       | 54.0        |
|        | AC/GT | 47.1     | 53.0 | 76.3       | 71.6        |
|        | AG/CT | 44.3     | 55.4 | 65.9       | 70.6        |
|        | AT/AT | 53.2     | 53.1 | 66.3       | 53.9        |
|        | CA/TG | 50.1     | 46.2 | 55.1       | 55.3        |
|        | CC/GG | 36.2     | 58.1 | 60.1       | 61.4        |
|        | CG/CG | 48.9     | 54.4 | 59.1       | 74.7        |
|        | GA/TC | 51.4     | 53.7 | 71.4       | 68.9        |
|        | GC/GC | 52.4     | 55.0 | 62.7       | 56.0        |
|        | TA/TA | 49.7     | 44.6 | 43.8       | 41.8        |
| Minor  | AA/TT | 47.1     | 48.9 | 87.4       | 86.7        |
|        | AC/GT | 48.6     | 47.0 | 74.1       | 69.9        |
|        | AG/CT | 41.3     | 49.3 | 72.6       | 74.1        |
|        | AT/AT | 58.0     | 47.7 | 76.9       | 72.9        |
|        | CA/TG | 48.9     | 48.5 | 65.8       | 66.0        |
|        | CC/GG | 53.7     | 54.0 | 68.3       | 58.2        |
|        | CG/CG | 50.8     | 45.4 | 62.8       | 62.3        |
|        | GA/TC | 42.1     | 55.8 | 73.7       | 50.3        |
|        | GC/GC | 56.4     | 43.6 | 63.0       | 59.2        |
|        | TA/TA | 53.7     | 60.0 | 72.4       | 70.5        |
